# Supplementary material
Source: PubMed Central journal article supplement (PMC8237382)
Supplement: NIHMS1710196-supplement-1.pdf [file NIHMS1710196-supplement-1.pdf]

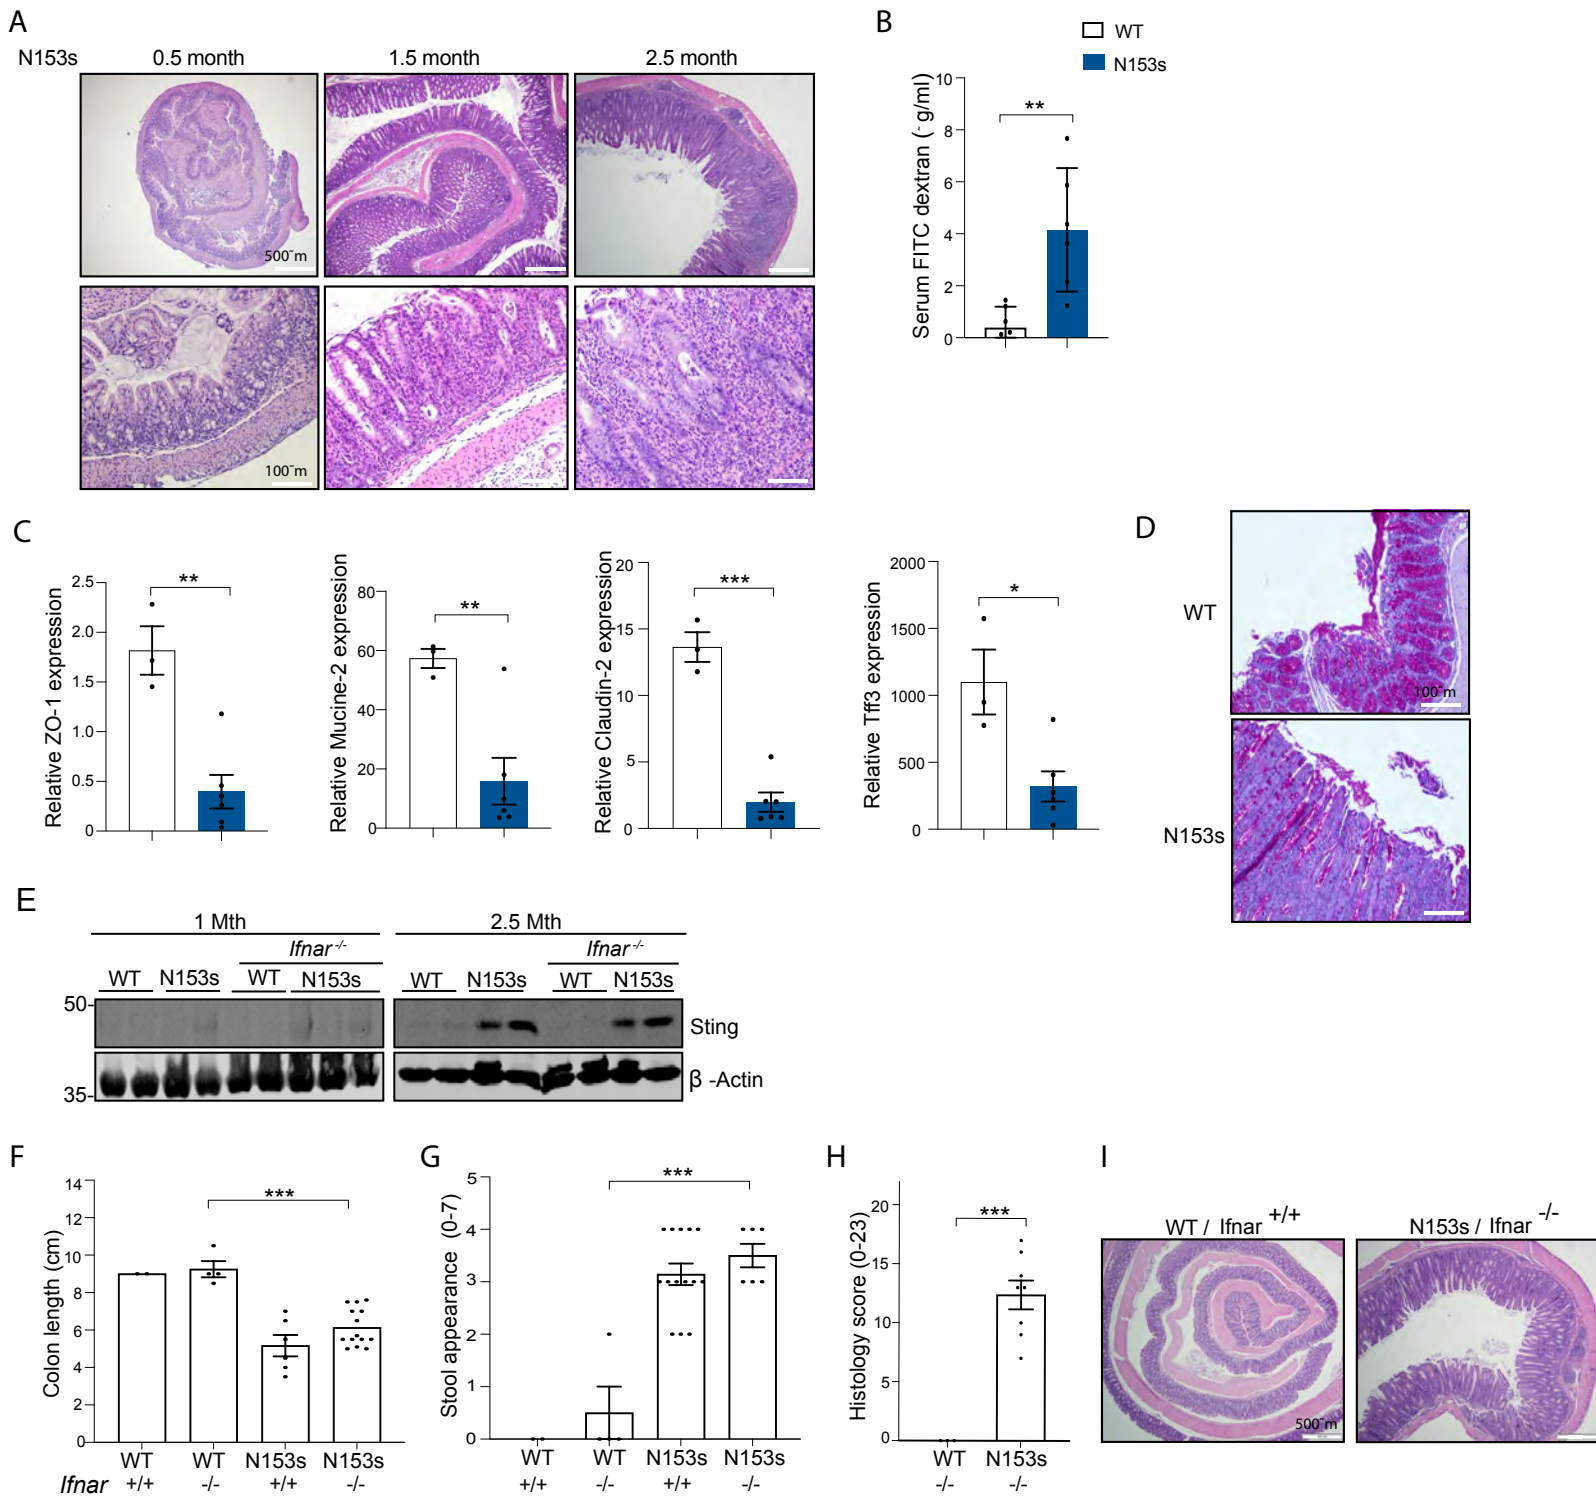

**Supp Figure 1. N153s mice exhibit intestinal inflammation independently of Type I Interferon. Related to Figure 1.** (A) Representative images of H&E-stained colon section of N153s mice at the indicated age. (B) Concentration of 4-kDa FITC dextran in plasma of N153s mice 4 hours post administration by oral gavage. (C) QPCR analysis of ZO-1, Mucine-2, Claudin-2 and Tff3 mRNA expression in colon tissue samples obtained from 4.5-months old N153s and WT littermate control mice. (\* $P < 0.05$ , \*\* $P < 0.01$ , \*\*\* $P < 0.001$ , Data are represented as mean  $\pm$  SEM of  $n = 2-4$  from 2 independent experiments). QPCR gene expression levels were normalized to TBP (D) Representative images of PAS-stained colon section of 4.5-month of age N153s and WT littermate control mice. (E) Representative images of Western blotting detecting STING in WT, N153s and N153s deficient for type I IFN receptor (IFNAR) mice at the indicated age. (F) Colon length, (G) stool appearance and (H) pathology score of 4-month old N153s mice intercrossed to Ifnar deficient mice (\*\* $P < 0.001$ , Data are represented as mean  $\pm$  SEM of  $n = 2-7$  from 3 independent experiments). (I) Representative images of H&E stained colon section of the indicated mice.

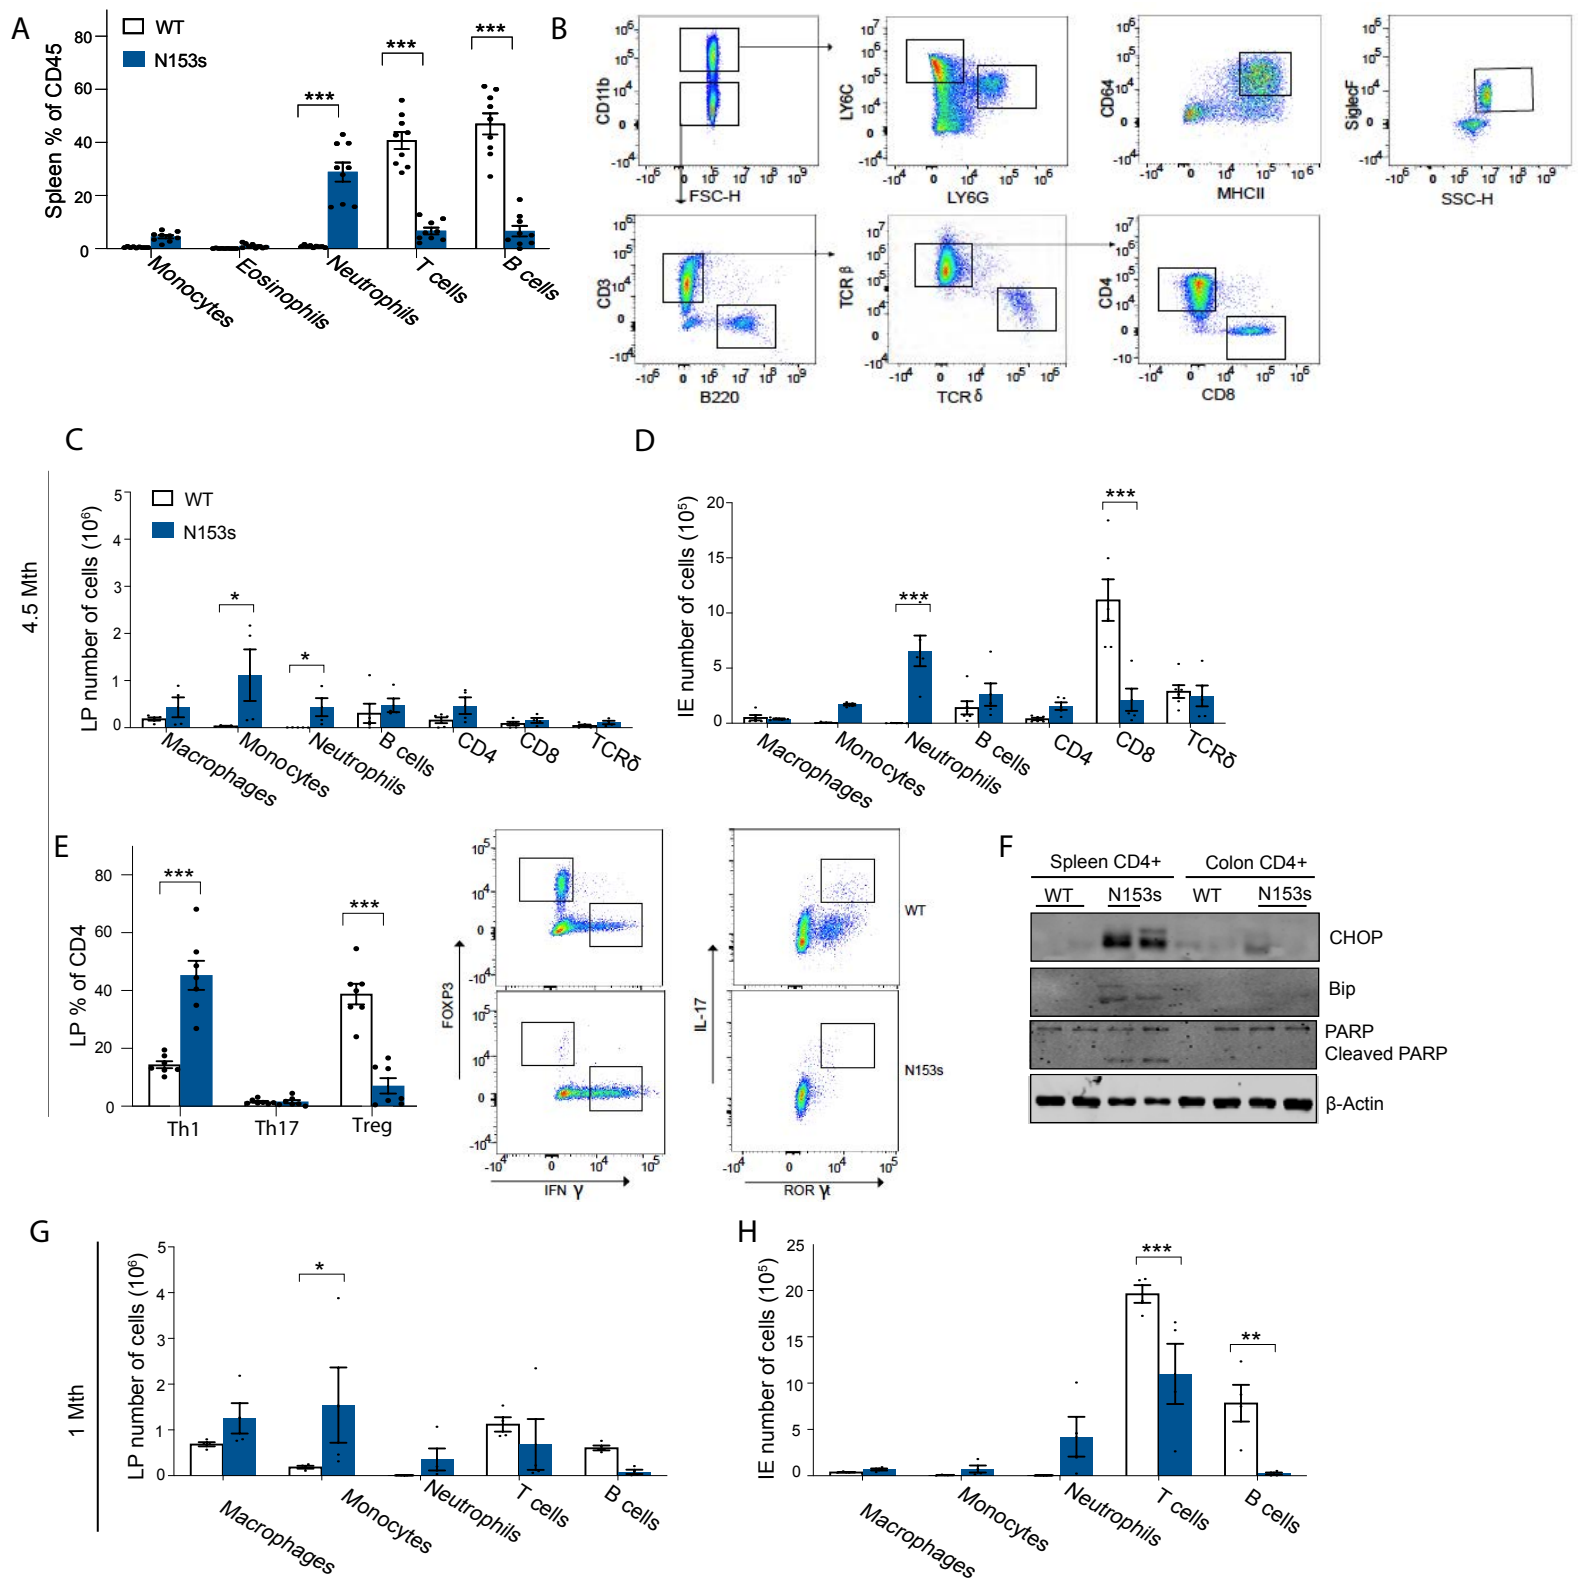

**Supp Figure 2. N153s mice develop immune cell alterations in the colon and spleen. Related to Figure 2.** (A) Flow cytometry analysis of splenic immune cells presented as % out of CD45+ cells (\*\**P*<0.001. Data are represented as mean ±SEM of *n*=2-3 from 5 independent experiments). (B) Representative flow cytometry gating strategy of colonic LP immune cells from N153s mice. Flow cytometry analysis of colonic (C) LP and (D) IE immune cells from 4.5-month-old. (E) Flow cytometry analysis and gate strategy of LP Th1 IL-1Thi RORt+, Th1 IFNhi and Treg FOuF3hi T cells (\*\**P*<0.001. Data are represented as mean ±SEM of *n*=2-5 from 2 independent experiments). (F) Representative images of Western blotting detecting CHOP, Bip and cleaved PARP1 in CD4+ T cells isolated from spleen and colon of 3.5-month-old N153s and WT littermate control mice. Flow cytometry analysis of (G) LP and (H) IE immune cells from 1-month-old N153s and WT littermate control mice presented as absolute number of cells. (\**P*<0.05, \*\**P*<0.001, Data are represented as mean ±SEM of *n*=3-5 from 2 independent experiments)

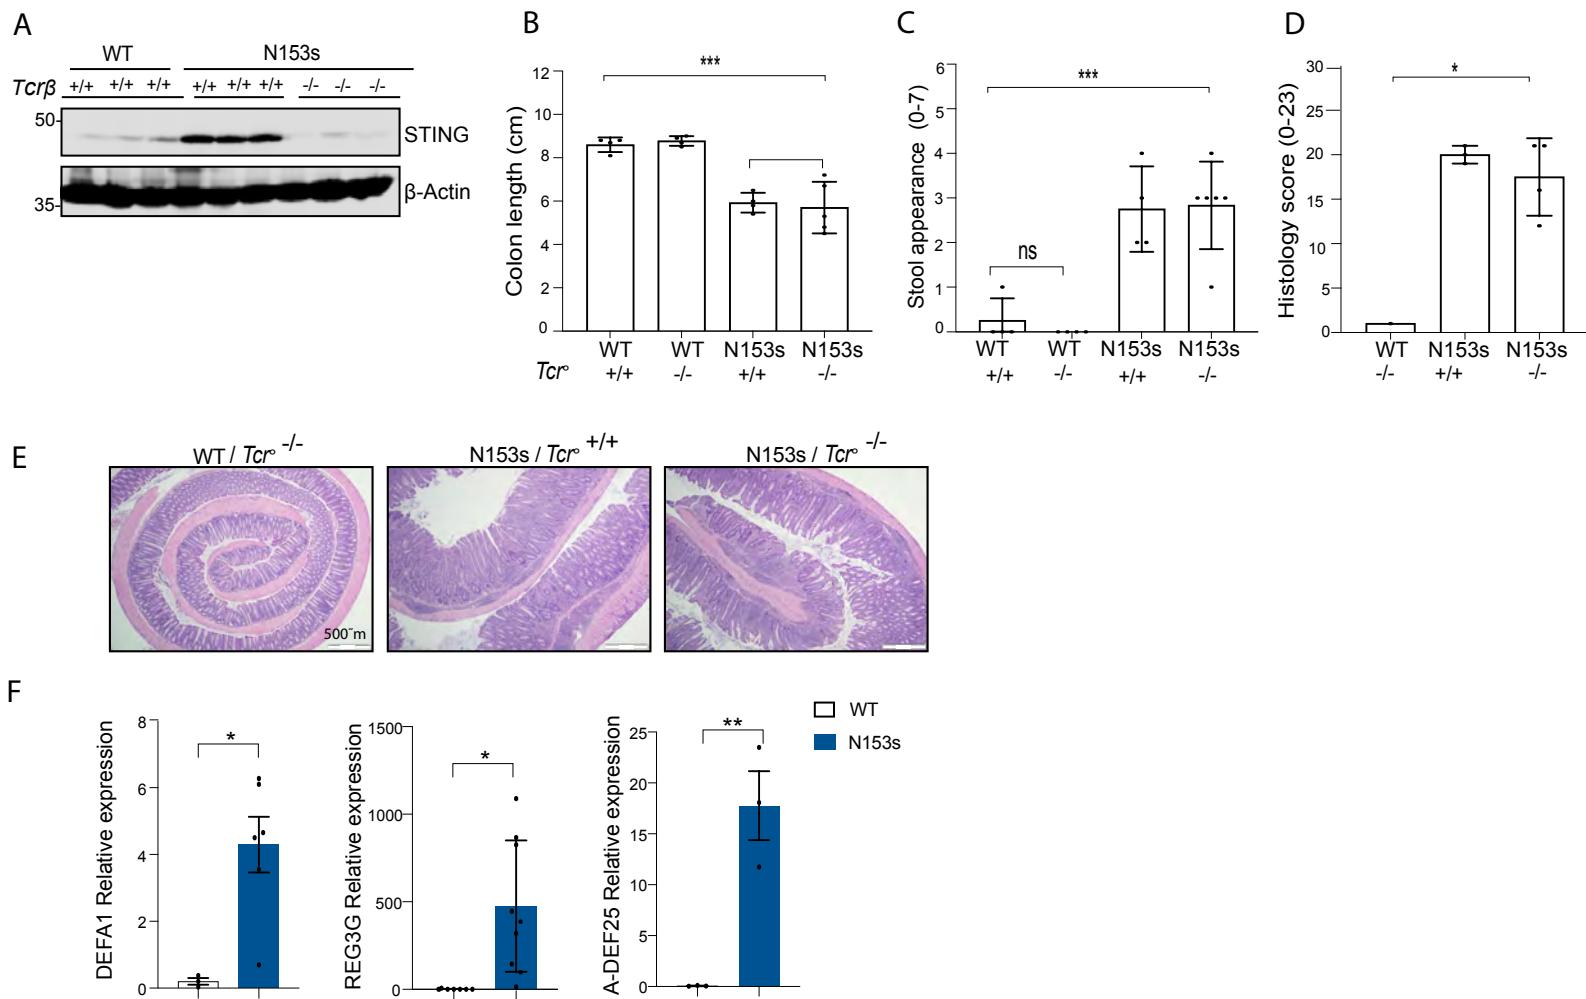

**Supp Figure 3. N153s mice exhibit T cell-dependent colitis. Related to Figure 2.** (A) Western blotting detecting STING in the indicated mice. (B) colon length, (C) stool appearance and (D) pathology score of the indicated mice at 4-months of age. (\* $P < 0.05$ , \*\*\* $P < 0.001$ . Data are represented as mean  $\pm$  SEM of  $n=3-5$  from 3 independent experiments). (E) Representative images of H&E-stained colon sections at 4-months of age. (F) qPCR analysis of colonic anti-microbial peptides, mRNA in 4.5-month-old N153s and WT 1 mice. Gene expression levels were normalized to TBP. (\* $P < 0.05$ , \*\* $P < 0.01$ . Data are represented as mean  $\pm$  SEM of  $n=3-4$  from 2 independent experiments).

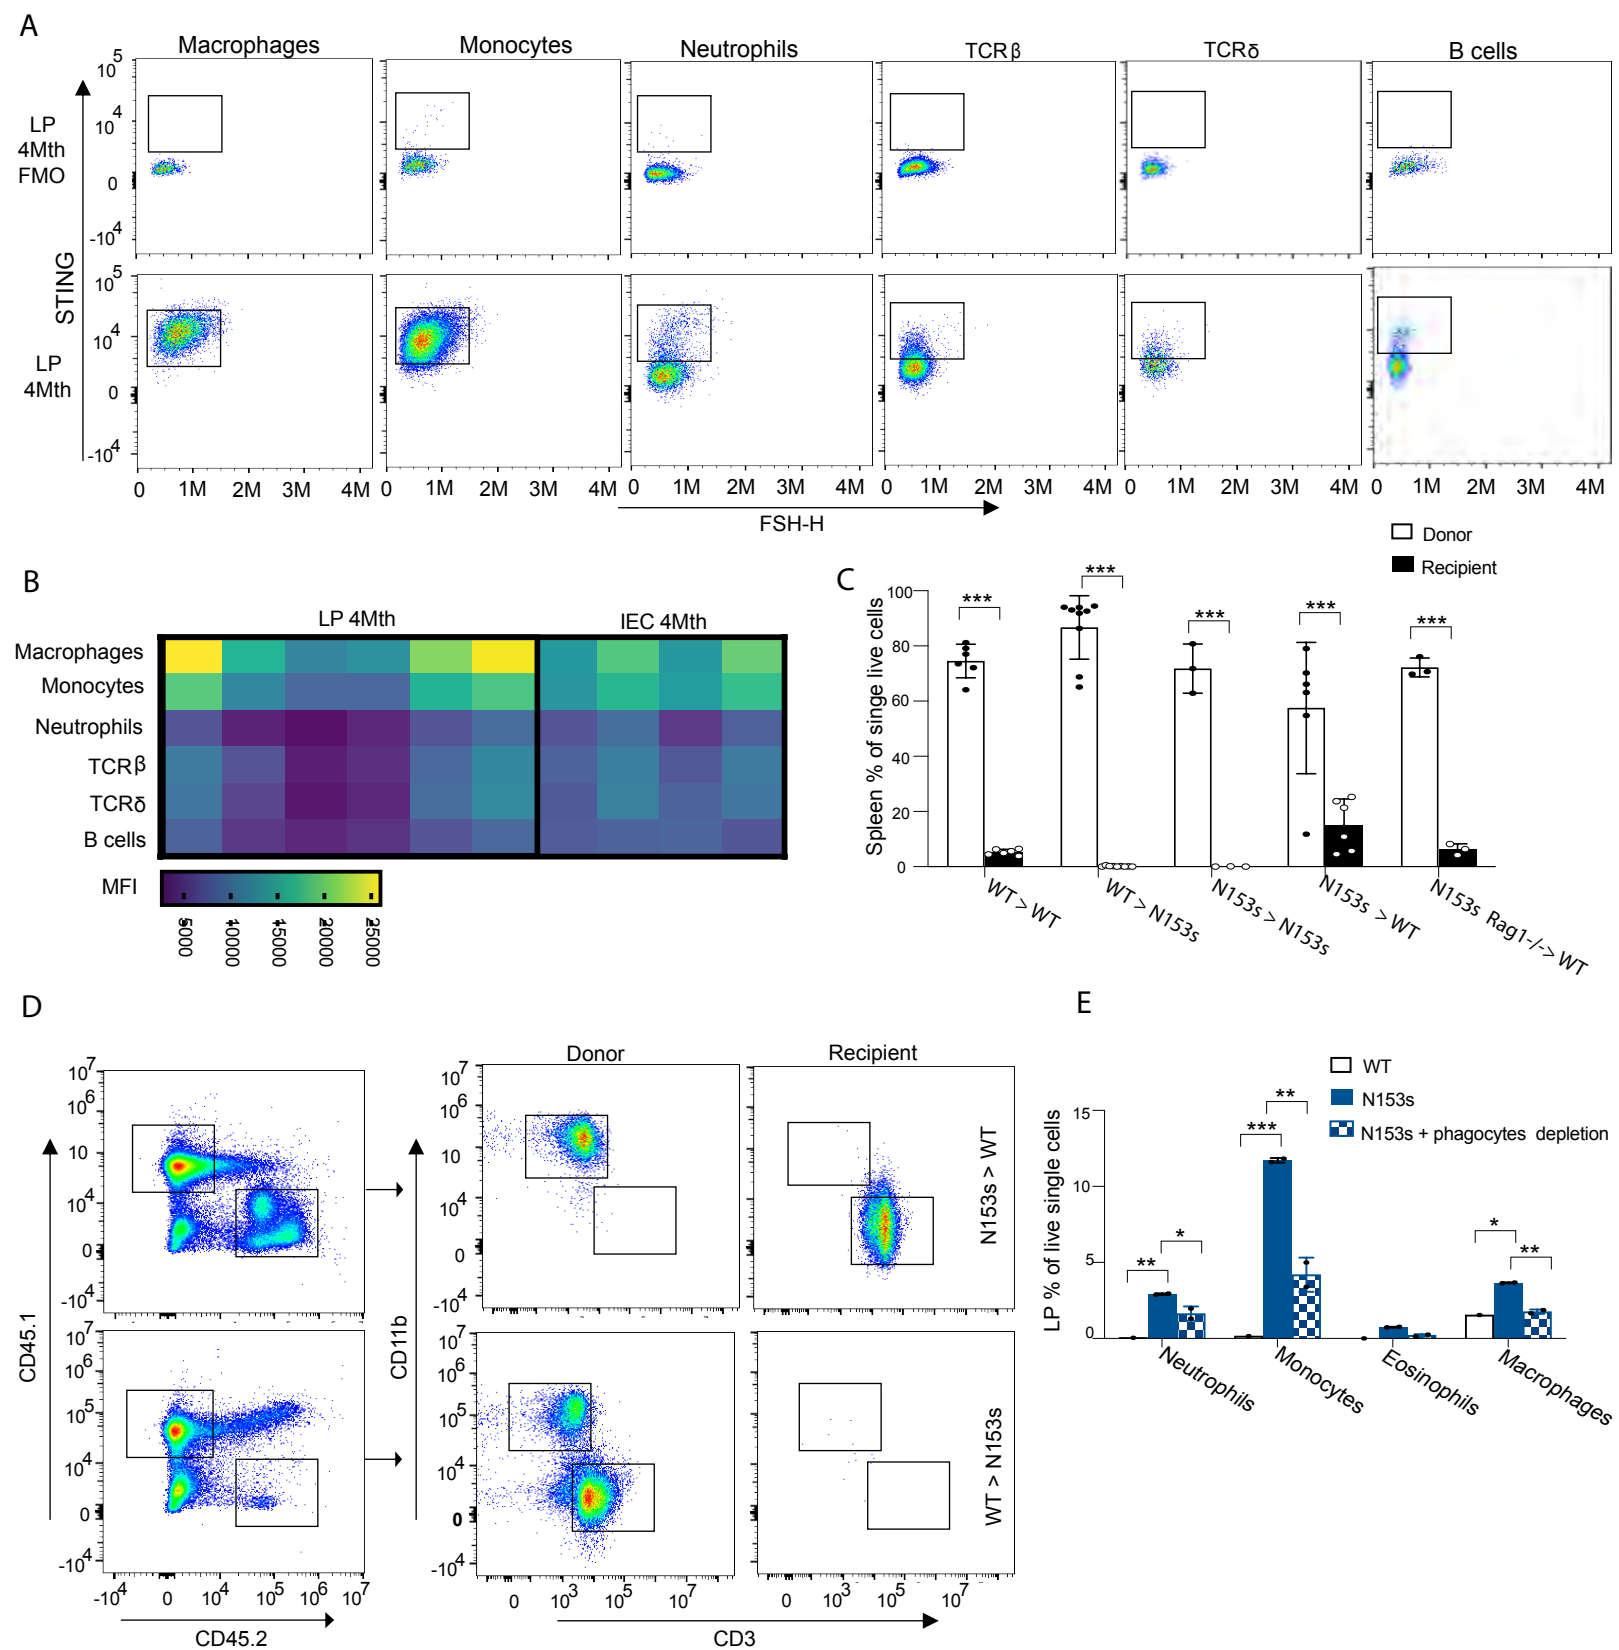

**Supp Figure 4. STING accumulates in colonic myeloid cells of N153s mice. Related to Figure 3.** (A) Representative flow cytometry gating strategy of colonic STING expressing LP immune cells from N153s mice at 4-months of age (lower panel). Accurate gating was determined by Fluorescent Minus One (FMO) panel lacks anti STING antibody (upper panel). (B) Heat-map representing Mean Fluorescent Intensity (MFI) of STING in colonic LP and IEC immune cells of each cell subset of N153s mice at the age of 4.5-month-old, quantified by flow cytometry. **Intrinsic activation of STING in myeloid cells drives intestinal inflammation in N153s mice. Related to Figure 4.** (C) flow cytometry analysis of splenic donor and recipient cells of the indicated mice ( $***P < 0.001$ . Data are represented as mean  $\pm$  SEM of  $n=2-5$  from 4 independent experiments). (D) Representative flow cytometry gating strategy of LP CD45.1 and CD45.2 cells of N153s > WT chimera mice. (E) Flow cytometry analysis of colonic myeloid cells of the indicated mice ( $*P < 0.05$ ,  $**P < 0.01$ ,  $***P < 0.001$ . Data are represented as mean  $\pm$  SEM of  $n=1-2$  from 2 independent experiments).

A

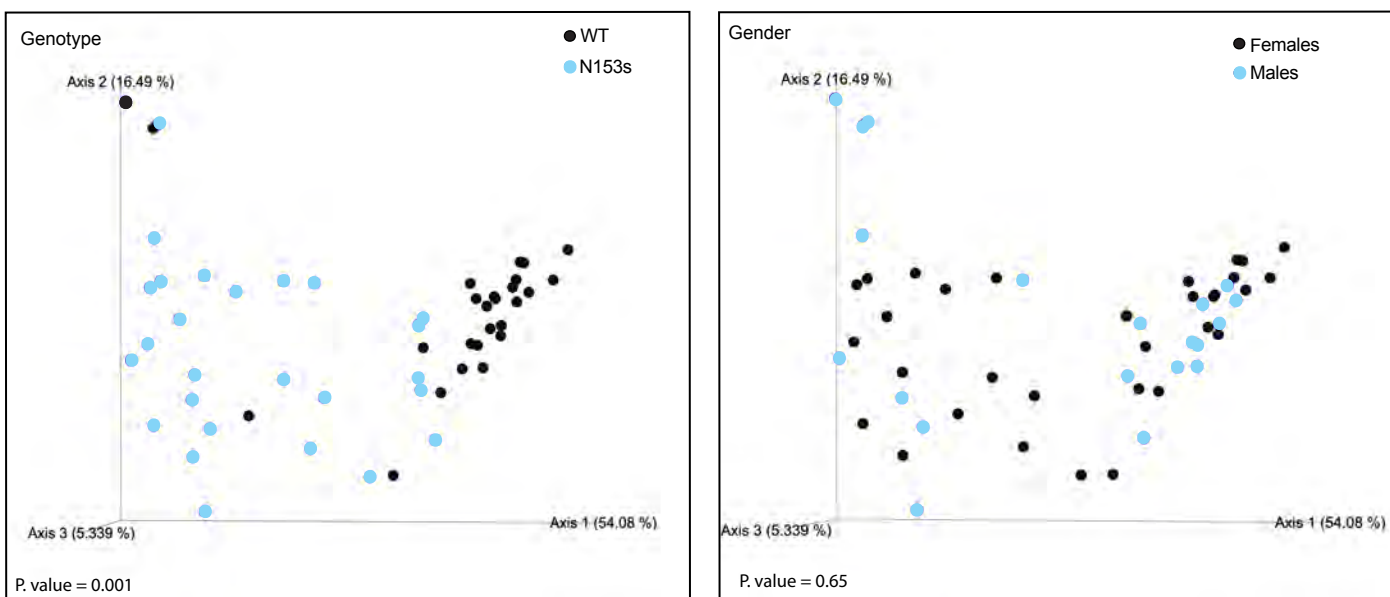

B

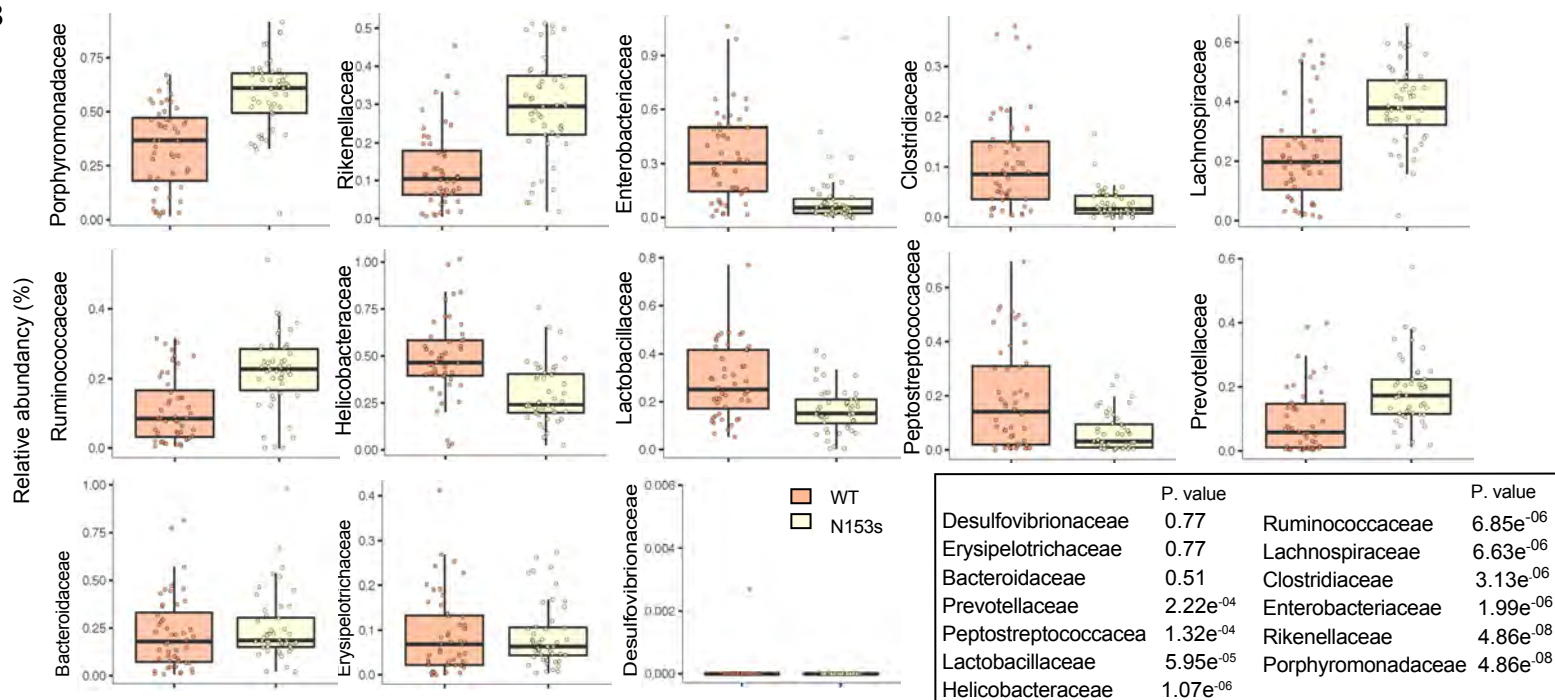

C

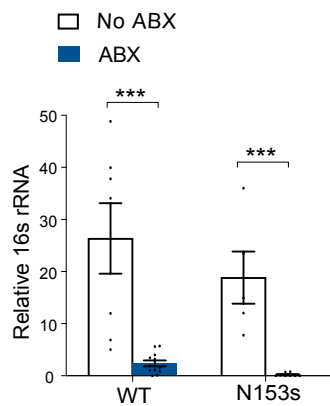

**Supp Figure 5. Commensal dysbiosis drives intestinal inflammation in N153s mice. Related to Figure 5.** (A) Principal coordinates analysis (PCoA) plots of 16S rDNA community profiles representing  $\alpha$ -diversity based on genotype and gender and using the weighted UniFrac distance metric; significance was tested using pairwise PERMANOVA. (B) Graphical summary of family-level, differential abundance by genotype. Significant taxa were determined using the MaAsLin2 multivariate statistical framework including both age and gender as random effect (Data are represented as mean  $\pm$  SEM of  $n=40-48$ ). (C) 16S rDNA gene copies as quantified by real time RT-PCR from fecal pellets collected from WT and N153s mice treated or untreated with broad spectrum antibiotic cocktail. Gene expression levels were normalized to GAPDH (Data are represented as mean  $\pm$  SEM of  $n=5-12$ ).

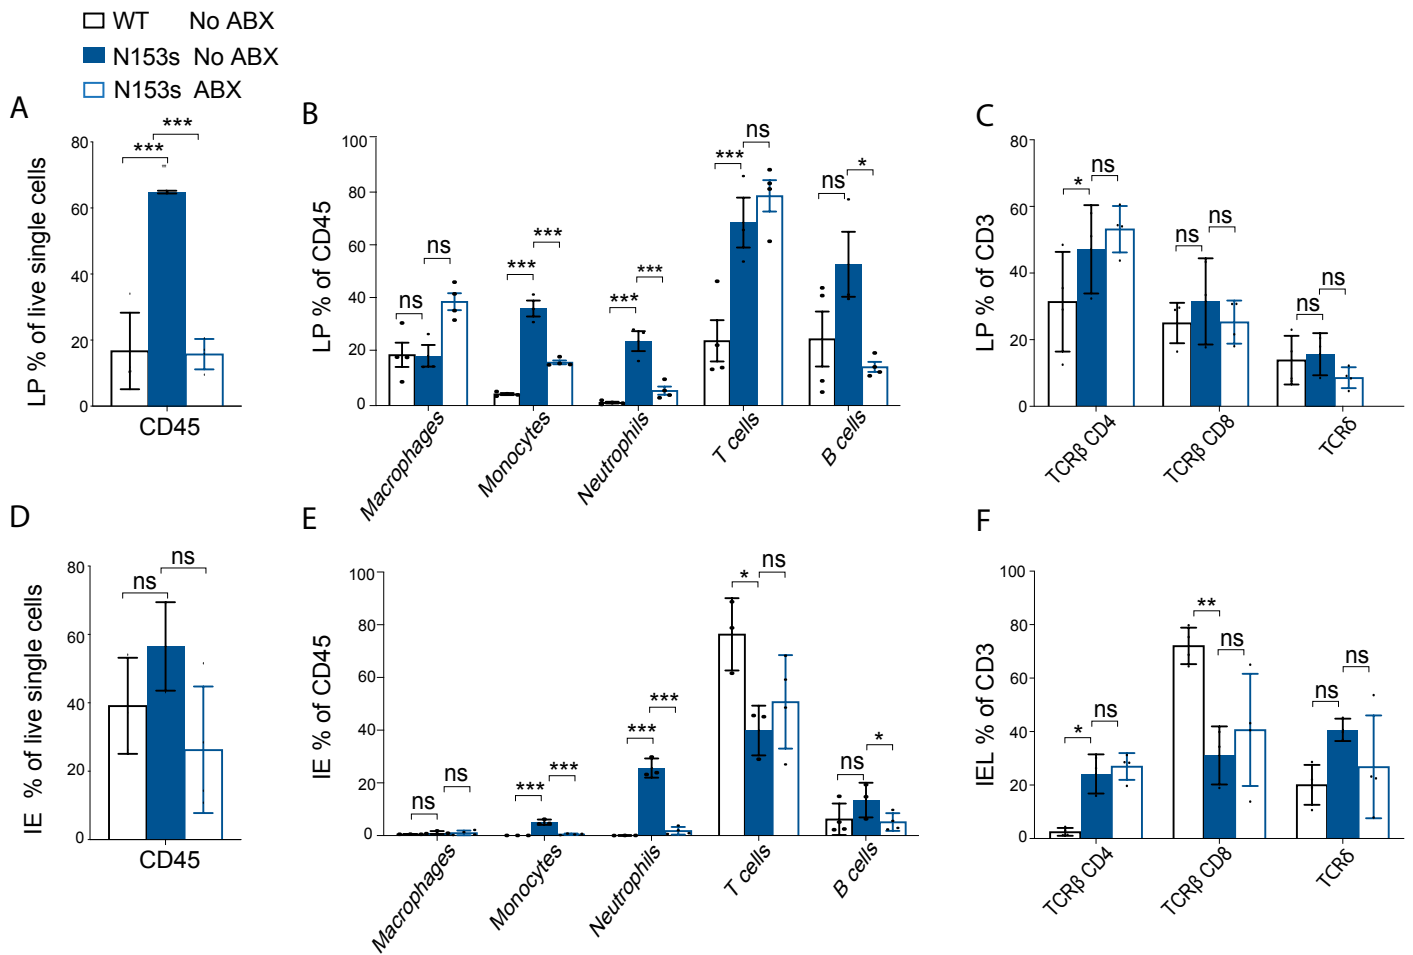

**Supp Figure 6. Depletion of commensal bacteria in N153s mice alter immune cell population. Related to Figure 6.** Flow cytometry analysis of colonic LP (A-C) and IE (D-F) immune cell populations from the indicated mice. Graphical summary of LP (A) and IE (D) CD45<sup>+</sup> cells presented as % out of live single cells. (B,E) CD11b<sup>+</sup>CD64<sup>+</sup>MHCII<sup>+</sup> macrophages, CD11b<sup>+</sup>Ly6Chi monocytes, CD11b<sup>+</sup> Ly6Ghi neutrophils, CD11b<sup>-</sup> CD3<sup>+</sup> T cells and CD11b<sup>-</sup> B200<sup>+</sup> B cells presented as % out of CD45<sup>+</sup> cells. (C,F) TCR $\beta$  CD4, TCR $\beta$  CD8 and TCR $\beta$  T cells presented as % out of CD3<sup>+</sup> cells. (Data are represented as mean  $\pm$ SEM of n=2-3 from 2 independent experiments).

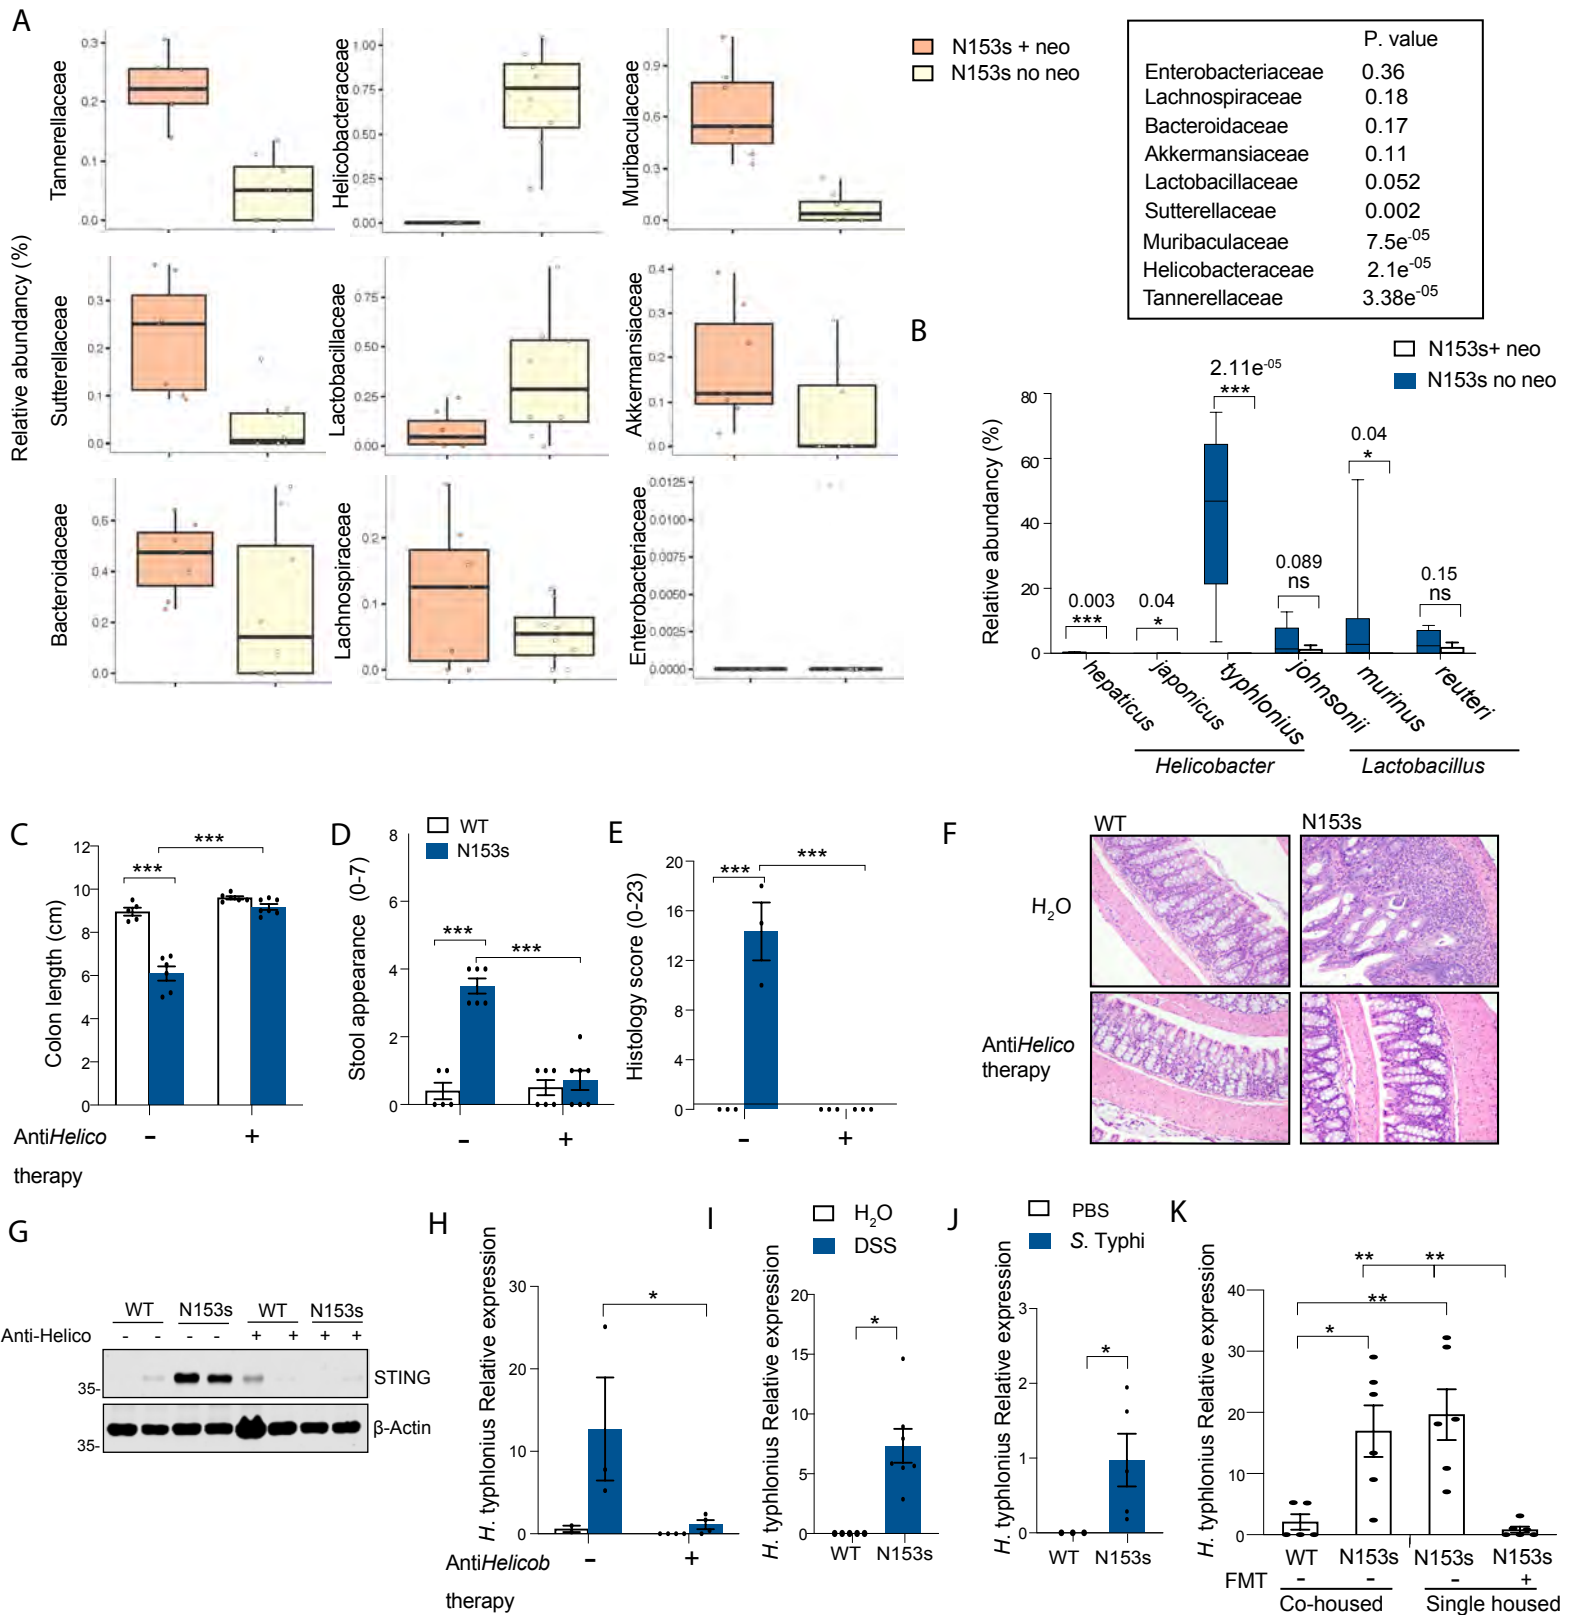

**Supp Figure 7. Shotgun sequencing revealed a significant reduction of Helicobacteraceae bacteria family. Related to Figure 7.** (A) Family-level relative abundance of fecal commensal flora determined by WGS. All taxa lower than 5% are indicated as “Other families”. Significance assessed using MaAsLin2 multivariate statistical framework. (Data are represented as mean  $\pm$ SEM of n=7-9). (B) Relative abundances at the species levels of fecal *Helicobacter* and *Lactobacillus* detected by WGS sequencing. (C) colon length, (D) stool appearance and (E) pathology score of the indicated mice. (F) H&E-stained colon sections and (G) Western blotting detecting STING in the indicated mice. (H) *H. typhlonius* relative expression quantified by qPCR from fecal pellets collected from the indicated mice. (\*P<0.05. Data are represented as mean  $\pm$ SEM of n=2 from 2 independent experiments). (I) *H. typhlonius* relative expression from fecal pellets collected from (I) DSS challenged mice and (J) mice challenged with *S.typhimurium* and (K) the indicated mice from FMT experiment, Gene expression levels were normalized to GAPDH (Data are represented as mean  $\pm$ SEM of n=2-4 from 2 independent experiments).
